# Supplementary material
Source: PubMed Central journal article supplement (PMC5466029)
Supplement: supp_tpc.16.00908_TPC2016-00908-RAR3_Supplemental_Data.pdf [file supp_tpc.16.00908_TPC2016-00908-RAR3_Supplemental_Data.pdf]

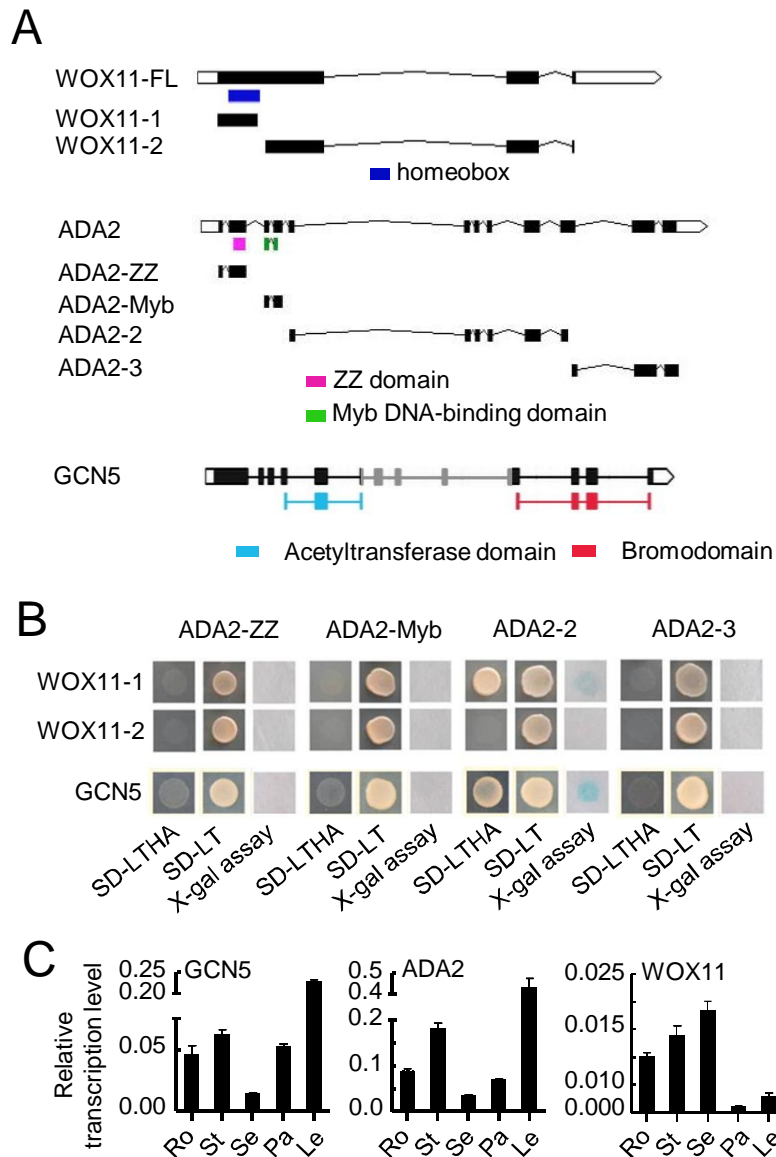

**Supplemental Figure 1 (Supports Figure 1). Mapping the interaction regions of ADA2, GCN5, and WOX11 by yeast two-hybrid assays and comparison of their expression profiles in rice tissues/organs. (A)** Schematics of *WOX11*, *ADA2*, and *GCN5* structures and truncated segments used for interaction assays. **(B)** Interaction of AD (the prey plasmid pGADT7) fusions of truncated *ADA2* with BD (the bait plasmid pGBKT7) fusions of truncated *WOX11* or full-length *GCN5*. Yeast cells transformed with different combinations of plasmids were grown on the SD-LT and SD-LTHA media. X-gal assays were performed. **(C)** Detection of *GCN5*, *ADA2*, and *WOX11* transcripts by RT-qPCR in roots (R<sub>0</sub>), intercalary meristem of young stem (St), 5 day seedling (Se), 5cm panicle (Pa), and mature leaf (Le). Bars are means  $\pm$  SD from three technical replicates.

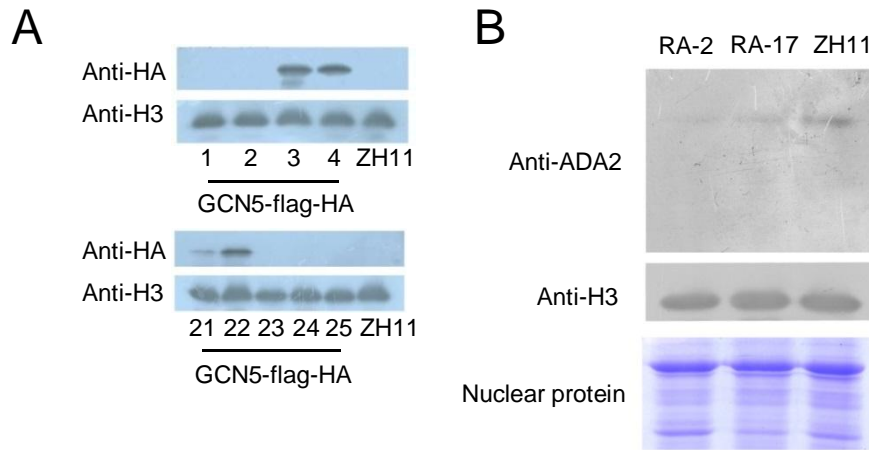

**Supplemental Figure 2 (Supports Figure 1 and Figure 3). Protein levels of GCN5 and ADA2 in transgenic plants. (A).** Detection of GCN5-HA fusion protein levels in 9 transgenic lines and wild type (ZH11) by immunoblots with anti-HA antibody. Anti-H3 was used as a control. **(B).** Detection of ADA2 protein levels in two *ADA2* RNAi lines and wild type (ZH11) by immunoblots using polyclonal anti-ADA2 antibody. Anti-H3 was used as a control.

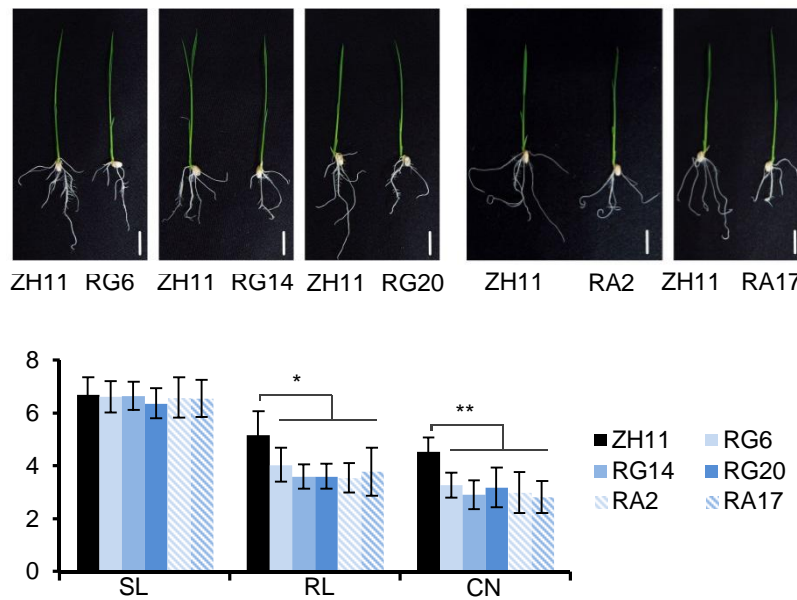

**Supplemental Figure 3 (Supports Figure 3). Root phenotypes of *GCN5* and *ADA2* RNAi seedlings with the same shoot length as wild type.** Upper, phenotype of *GCN5* and *ADA2* RNAi and wild type (ZH11) with the same shoot length. *GCN5* and *ADA2* RNAi seeds were germinated 1.5 days before ZH11 to obtain the same shoot length. bars=1cm. Lower, Statistical data from the *GCN5* and 2 *ADA2* RNAi lines. SL, shoot length. RL, root length. CN, crown root number. Bars are means  $\pm$  SD of 10 plants. Significant difference between transgenic lines and wild type (Student's *t* tests, *P* value<0.05 or 0.01) are marked by single or double asterisks.

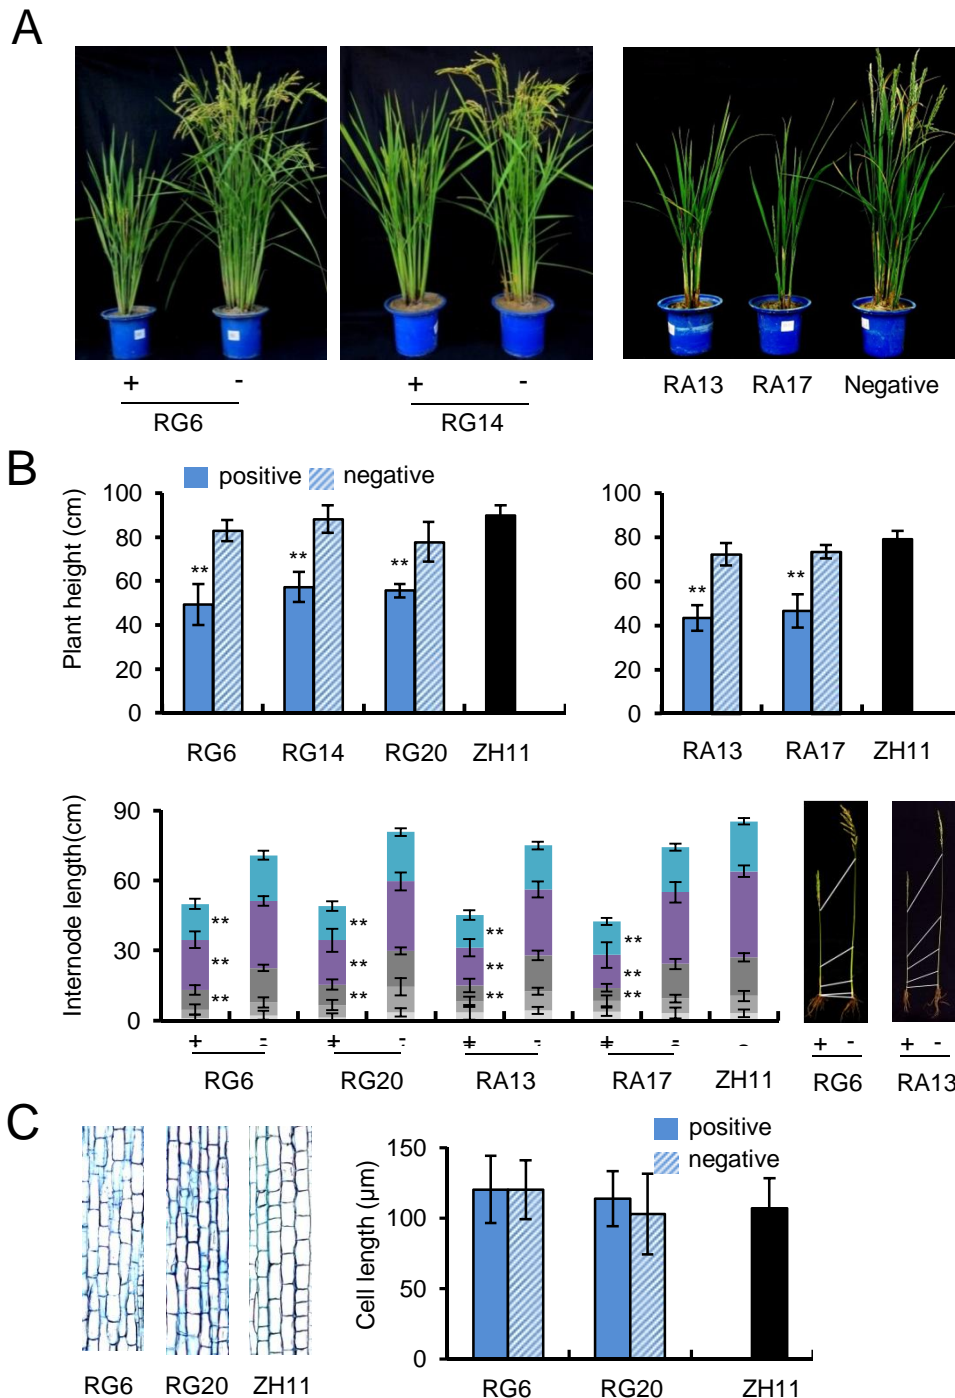

**Supplemental Figure 4 (Supports Figure 3). Phenotypes of *GCN5* and *ADA2* RNAi lines at mature stages. (A)** Phenotype of positive (+) and negative (-) (without the transgene) segregates of *GCN5* RNAi and over-expression lines. **(B)** Statistical data of plant height and/or internode length of *GCN5* RNAi and *ADA2* RNAi lines. Error bars= means  $\pm$  SD. Significant difference (Student *t*'s test, *P* value<0.01) between positive plants and negative plants or wild type were marked by two asterisks. **(C)** Comparison of epidermal cell length between *GCN5* RNAi line and wild type (ZH11).

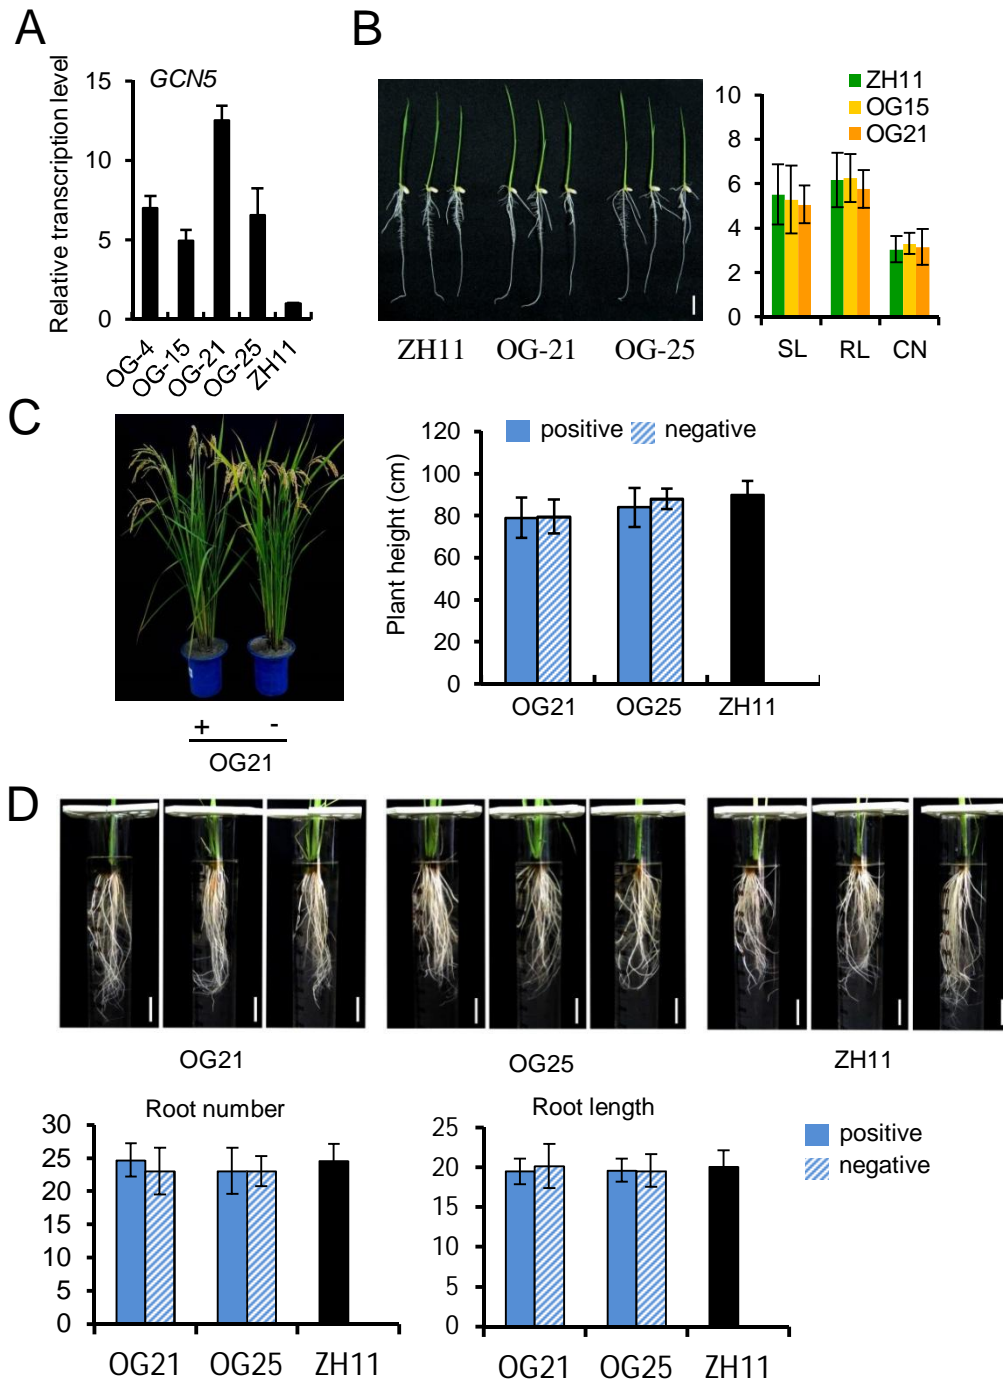

**Supplemental Figure 5 (Supports Figure 3). Production and phenotype of *GCN5* overexpression lines. (A)** RT-qPCR analysis of *GCN5* transcripts in 4 transgenic lines and wild type (ZH11). Values are relative to *ACTIN1* transcripts. Bars are means  $\pm$  SD from three technical replications. **(B and C)** No obvious phenotype observed in *GCN5* over-expression lines compared with wild type. **(B)** seedlings at day 7 after germination. **(C)** OG21 positive and negative segregants at mature stage. Statistical data from 2 over-expression lines (OG-21 and OG-25) and wild type are shown. Bars represent means  $\pm$  SD. **(C)** Comparison of root number and length of 45-day-old hydroponic *GCN5* over-expression and wild type plants. Scale bars = 3cm. Statistical data from positive and negative segregants of OG-21 and OG-25 lines and wild type are shown in the lower panel.

A

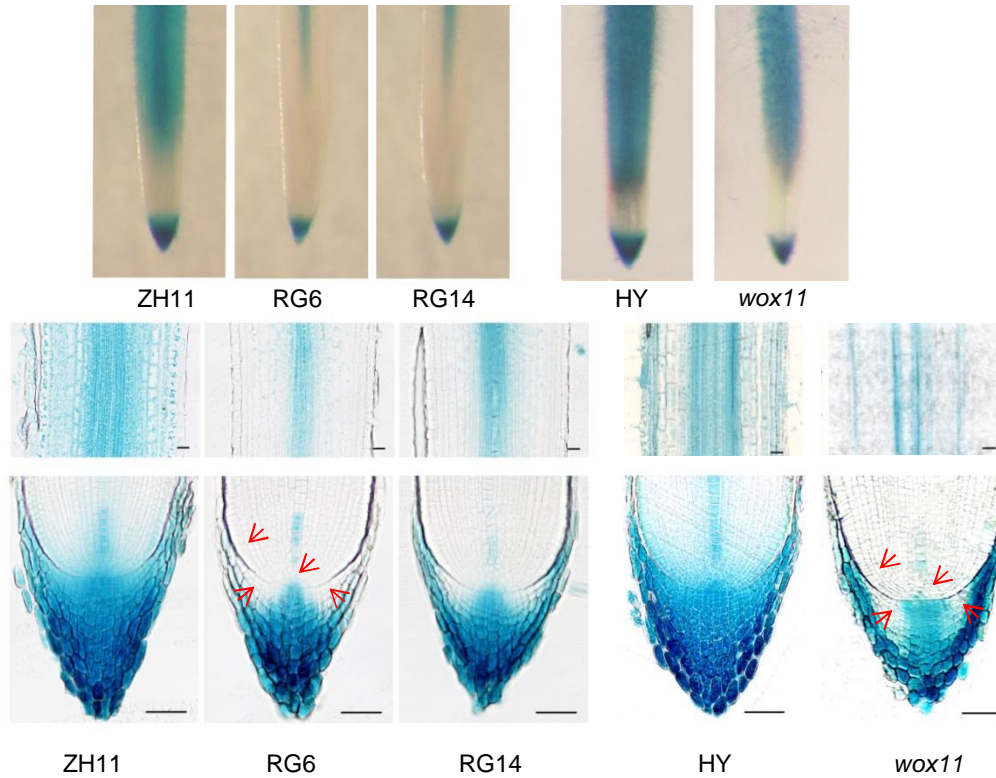

B

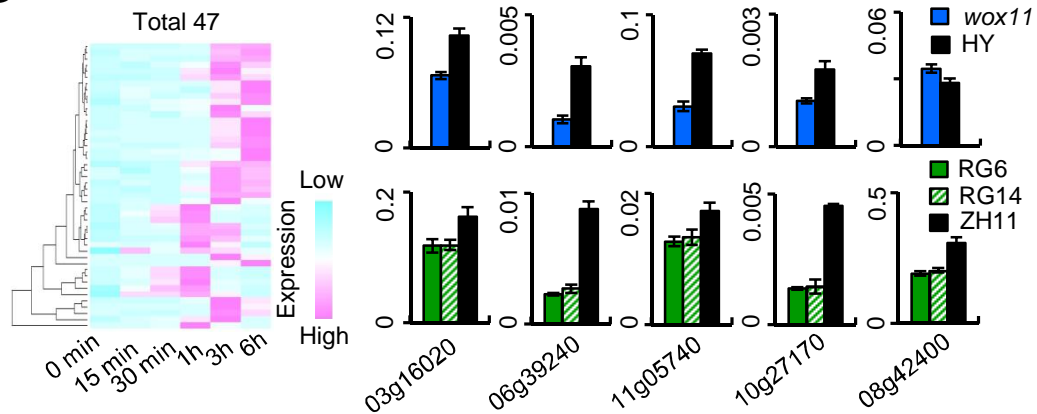

**Supplemental Figure 6 (Supports Figures 4 to 7). *GCN5* and *WOX11* are required for auxin accumulation or response in crown root tip. (A)** Upper panels, examination of *DR5:GUS* expression by GUS staining in roots of *GCN5* RNAi lines, *wox11* mutant, and the corresponding wild type, ZH11 and HY, respectively. Middle and lower panels, enlarged views of longitudinal sections of root differentiation zones and meristem zones. Red arrows indicates the regions with much lower *DR5:GUS* expression in *GCN5* RNAi lines or *wox11* mutant compared with wild type. Bars = 50  $\mu$ m. **(B)** Left, heat map of transcripts induced by auxin of *GCN5* regulated auxin inducible genes. Right, several auxin inducible genes are down-regulated in *GCN5* RNAi and *wox11* mutant. 08g42400 is used as a negative control, which is down-regulated in *GCN5* RNAi but not in *wox11* mutant.

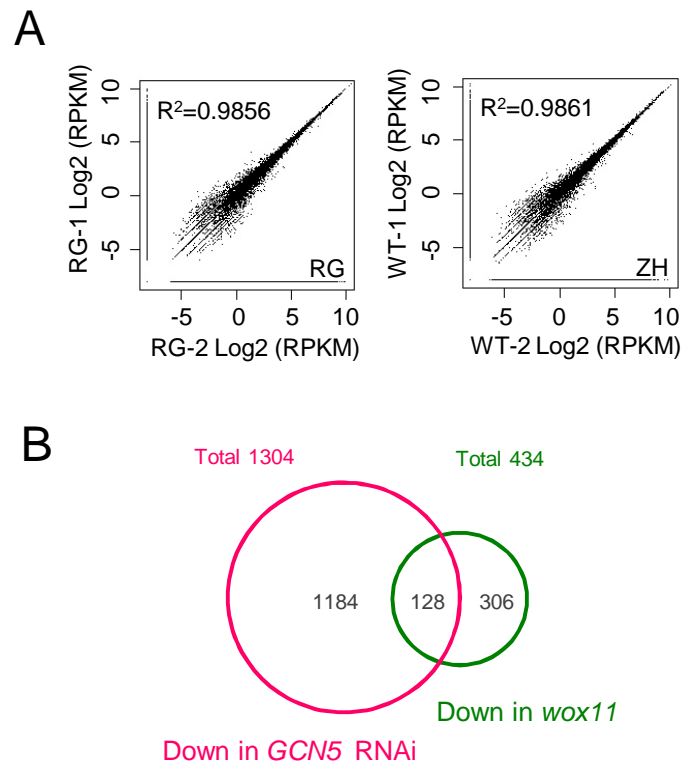

**Supplemental Figure 7 (Supports Figure 5). RNA-seq analysis of *GCN5* RNAi plants and comparison with down-regulated genes in *wox11* root tips. (A)** Correlation of the crown root tip RNA-seq replicates by two-wise scatter plot. **(B)** Overlapping of down-regulated genes in crown root tips of *GCN5* RNAi and *wox11* mutant seedlings.

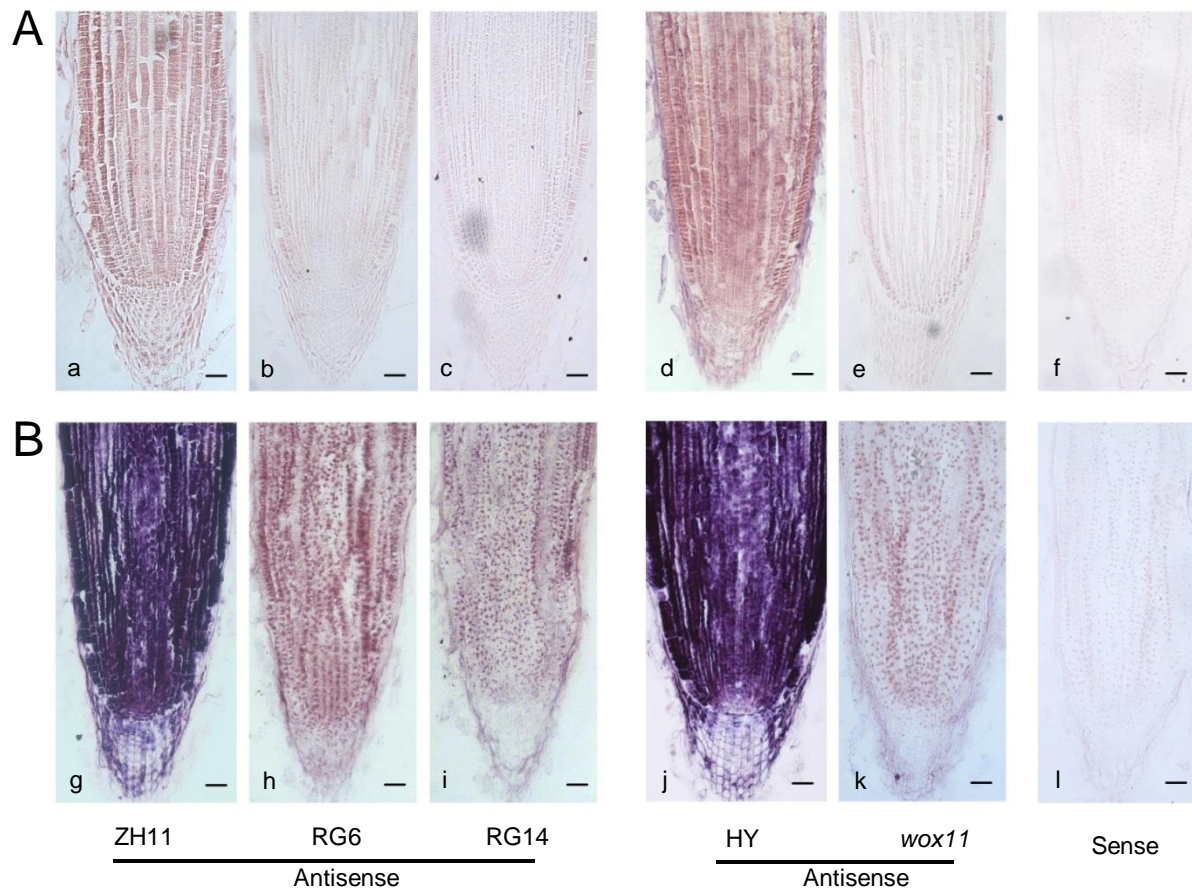

**Supplemental Figure 8 (Supports Figure 6). *In situ* hybridization detection of *OsPIN9* and *OsCSLF6* transcripts in crown root tip of two *GCN5* RNAi lines, *wox11* mutant, and their corresponding wild types. (a to e, g to k), antisense probe. (f, l), sense probe control. Bars = 25  $\mu$ m.**

**A**

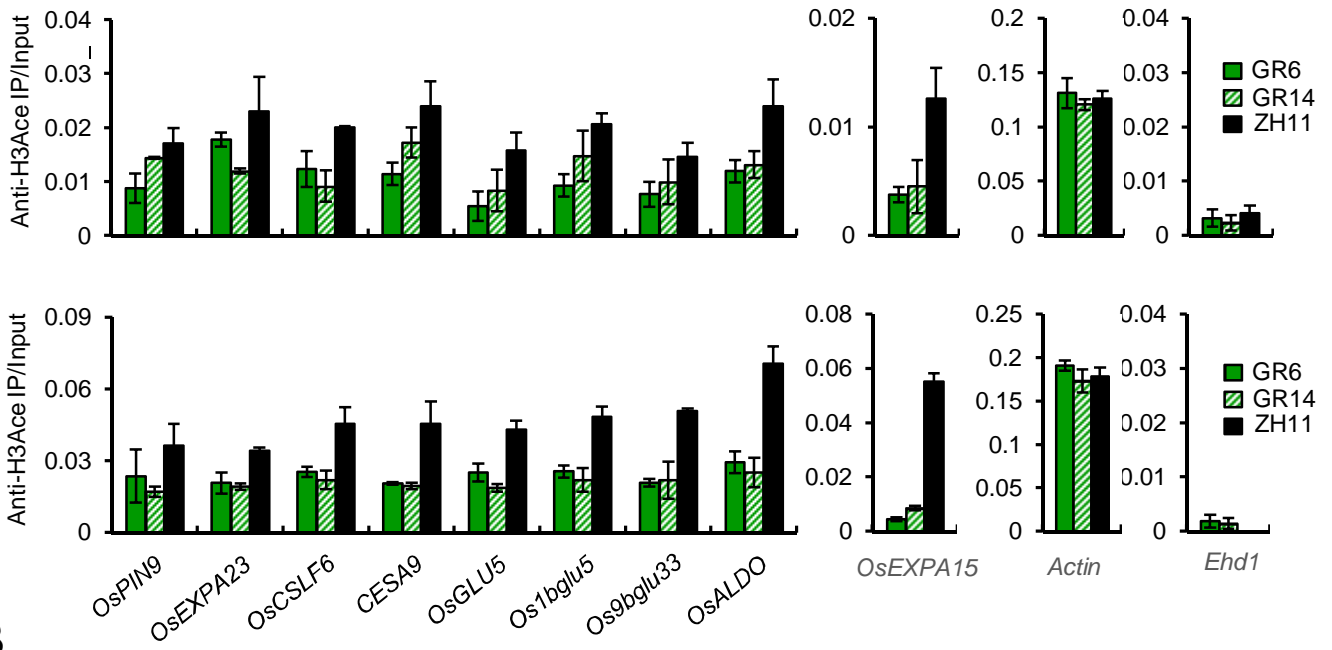

**B**

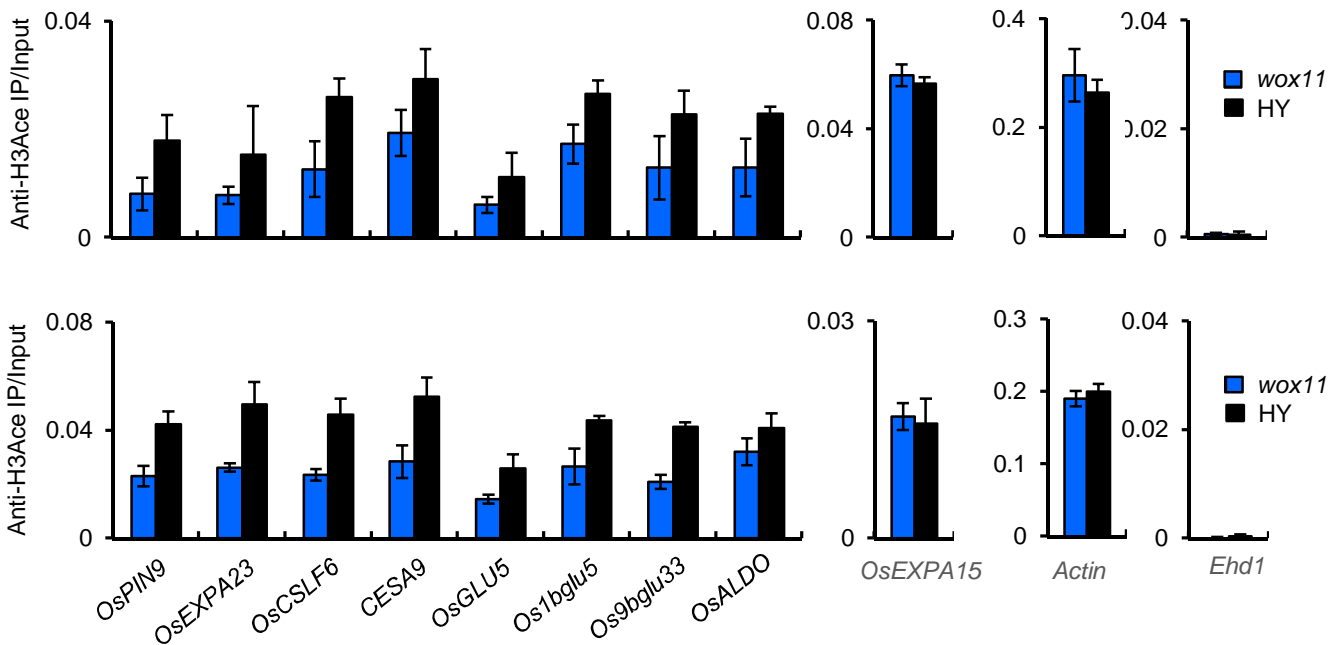

**Supplemental Figure 9 (Supports Figure 7). The other two biological replicates of the H3 acetylation ChIP-qPCR assays shown in Fig 7A, B.** Left histograms are ChIP assays with anti-H3Ac of 8 common target genes in roots of two *GCN5* RNAi lines compared with wild type (ZH11) (A), and *wox11* mutant compared with wild type (HY) (B). Histograms in the right side are tests of *OsEXPA15* and *Actin* loci as controls. Bars represent means  $\pm$  SD from three technical repeats. For the biological replicates in A and B, crown roots from 2 independent germinations for each genotype were used for the ChIP analysis.

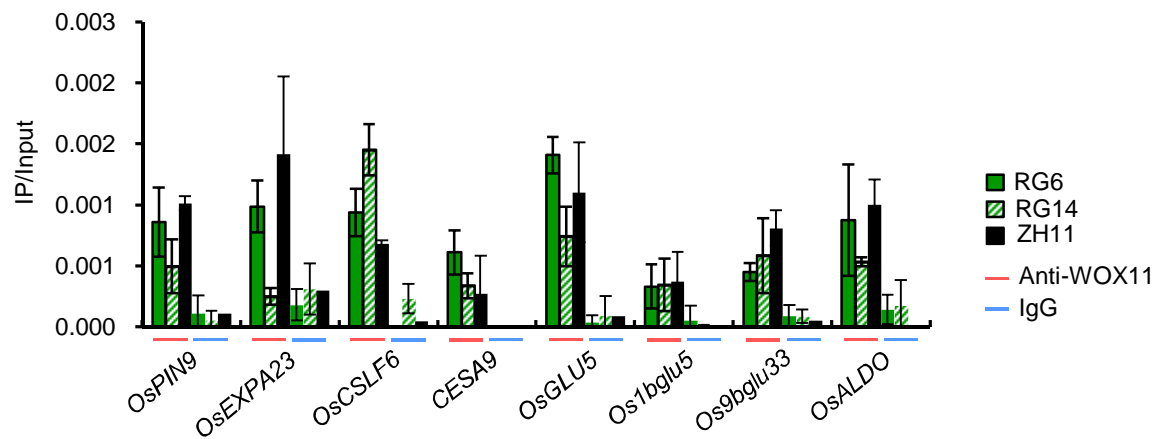

**Supplemental Figure 10 (Supports Figure 7). *GCN5* RNAi does not affect WOX11 binding to target genes.** ChIP assays were performed using anti-WOX11 antibody with roots of wild type and two *GCN5* RNAi lines. Anti-IgG was used as controls.

**Supplemental Table 1: RNA-seq reads and analysis data.**

| Line |             | Raw reads | Clean reads       | Mapped reads      | Unmapped reads   |
|------|-------------|-----------|-------------------|-------------------|------------------|
| RG-1 | Left reads  | 35323265  | 35310748 (99.96%) | 30915215 (87.56%) | 4392600 (12.44%) |
|      | Right reads | 35323265  | 35269495 (99.85%) | 30213452 (86.78%) | 4603244 (13.22%) |
| RG-2 | Left reads  | 35574250  | 35565540 (99.98%) | 31254470 (87.89%) | 4308372 (12.11%) |
|      | Right reads | 35574250  | 35522748 (99.86%) | 30608454 (87.24%) | 4478009 (12.76%) |
| WT-1 | Left reads  | 27670810  | 27662015 (99.97%) | 24547199 (88.75%) | 3112758 (11.25%) |
|      | Right reads | 27670810  | 27622220 (99.82%) | 23896903 (87.85%) | 3303807 (12.15%) |
| WT-2 | Left reads  | 32621071  | 32589206 (99.90%) | 28878952 (88.62%) | 3707804 (11.38%) |
|      | Right reads | 32621071  | 32550549 (99.78%) | 28293208 (87.98%) | 3867198 (12.02%) |

**Supplemental Table 2. Gene ontology analysis of down-regulated genes by *GCN5* RNAi.**

| GO ID      | GO Name                            | RG down | All gene | P value |
|------------|------------------------------------|---------|----------|---------|
| GO:0005975 | carbohydrate metabolic process     | 48      | 600      | 0       |
| GO:0006073 | cellular glucan metabolic process  | 8       | 30       | 0       |
| GO:0006333 | chromatin assembly or disassembly  | 1       | 928      | 0       |
| GO:0006468 | protein amino acid phosphorylation | 31      | 1593     | 0       |
| GO:0006508 | proteolysis                        | 36      | 3377     | 0       |
| GO:0006629 | lipid metabolic process            | 36      | 280      | 0       |
| GO:0006808 | regulation of nitrogen utilization | 10      | 30       | 0       |
| GO:0006869 | lipid transport                    | 19      | 106      | 0       |
| GO:0006979 | response to oxidative stress       | 29      | 186      | 0       |
| GO:0007047 | cellular cell wall organization    | 23      | 132      | 0       |
| GO:0008152 | metabolic process                  | 166     | 1968     | 0       |
| GO:0009664 | plant-type cell wall organization  | 12      | 42       | 0       |
| GO:0009765 | photosynthesis, light harvesting   | 16      | 17       | 0       |
| GO:0015979 | photosynthesis                     | 31      | 177      | 0       |
| GO:0016068 | type I hypersensitivity            | 25      | 283      | 0       |
| GO:0044237 | cellular metabolic process         | 17      | 133      | 0       |
| GO:0046274 | lignin catabolic process           | 7       | 26       | 0       |
| GO:0055114 | oxidation reduction                | 107     | 1199     | 0       |
| GO:0007155 | cell adhesion                      | 3       | 418      | 0.0001  |
| GO:0015995 | chlorophyll biosynthetic process   | 6       | 21       | 0.0001  |
| GO:0042309 | homeiothermy                       | 90      | 1647     | 0.0001  |
| GO:0050826 | response to freezing               | 90      | 1647     | 0.0001  |
| GO:0006950 | response to stress                 | 19      | 204      | 0.0002  |
| GO:0006952 | defense response                   | 9       | 626      | 0.0003  |
| GO:0016042 | lipid catabolic process            | 8       | 48       | 0.0003  |
| GO:0006915 | apoptosis                          | 7       | 532      | 0.0004  |
| GO:0009853 | photorespiration                   | 3       | 5        | 0.0005  |
| GO:0019253 | reductive pentose-phosphate cycle  | 3       | 5        | 0.0005  |
| GO:0046677 | response to antibiotic             | 7       | 48       | 0.0016  |
| GO:0006006 | glucose metabolic process          | 4       | 15       | 0.0018  |
| GO:0006886 | intracellular protein transport    | 1       | 214      | 0.0023  |
| GO:0019953 | sexual reproduction                | 6       | 39       | 0.0026  |
| GO:0009239 | enterobactin biosynthetic process  | 9       | 84       | 0.0031  |
| GO:0015904 | tetracycline transport             | 6       | 41       | 0.0033  |
| GO:0015031 | protein transport                  | 2       | 245      | 0.0037  |
| GO:0006633 | fatty acid biosynthetic process    | 12      | 139      | 0.004   |
| GO:0006826 | iron ion transport                 | 5       | 30       | 0.0041  |
| GO:0030418 | nicotianamine biosynthetic process | 2       | 3        | 0.0041  |
| GO:0006412 | translation                        | 20      | 863      | 0.0049  |

|            |                                |    |     |        |
|------------|--------------------------------|----|-----|--------|
| GO:0030001 | metal ion transport            | 11 | 129 | 0.0061 |
| GO:0030245 | cellulose catabolic process    | 4  | 21  | 0.0062 |
| GO:0030244 | cellulose biosynthetic process | 5  | 34  | 0.0069 |
| GO:0009058 | biosynthetic process           | 17 | 251 | 0.0076 |
| GO:0009813 | flavonoid biosynthetic process | 2  | 4   | 0.0079 |
| GO:0006457 | protein folding                | 17 | 254 | 0.0083 |
